# Supplementary material for: Antibiotic Resistance Acquisition in the First Week of Life
Source: Front Microbiol. 2018 Jul 4;9:1467. doi: 10.3389/fmicb.2018.01467 (PMC6039568; doi:10.3389/fmicb.2018.01467)
Supplement: Supplementary file 1 [file Table_1.XLSX]

## Sheet: Feuil1
Table S1 : Gram-negative bacteria isolated in this study.
AMP: ampicillin; AMC: amoxicillin and clavulanic acid; TZP: piperacillin and tazobactam; TIC: ticarcillin; IPM: imipenem; CTX: cefotaxim; CAZ: ceftazidime; AN: amikacin; TOB: tobramycin; GM: gentamicin; NAL: nalidixic acid; OFX: ofloxacin; CIP: ciprofloxacin; SXT: trimethoprim and sulfamethoxazole
Patient	Sample	Microorganism	A M P	A M C	T Z P	T I C	I P M	C T X	C A Z	A N	T O B	GM	N A L	O F X	C I P	S X T	Acquired beta-lactamase gene	Integron	Gene cassette content
1	Stool	Enterobacter cloacae	R	R	S	S	S	S	S	S	S	S	S	S	S	S
4	Meconium	Enterobacter aerogenes	R	R	S	S	S	S	S	S	S	S	S	S	S	S
	Stool	Enterobacter aerogenes	R	R	S	S	S	S	S	S	S	S	S	S	S	S
6	Meconium	Escherichia coli	S	S	S	S	S	S	S	S	S	S	S	S	S	S
	Stool	Escherichia coli	S	S	S	S	S	S	S	S	S	S	S	S	S	S
9	Stool	Escherichia coli	S	S	S	S	S	S	S	S	S	S	S	S	S	S
11	Stool	Escherichia coli	S	S	S	S	S	S	S	S	S	S	S	S	S	S
15	Meconium	Escherichia coli	S	S	S	S	S	S	S	S	S	S	S	S	S	S
	Stool	Escherichia coli	S	S	S	S	S	S	S	S	S	S	S	S	S	S
16	Stool	Acinetobacter ursingii	R	R	S	S	S	I	S	S	S	S	R	R	I	R
18	Stool	Escherichia coli	R	I	S	R	S	S	S	S	S	S	S	S	S	S	blaTEM-1
19	Stool	Enterobacter cloacae	R	R	S	S	S	S	S	S	S	S	S	S	S	S
		Enterobacter cloacae	R	R	S	S	S	S	S	S	S	S	S	S	S	S
20	Stool	Escherichia coli	S	S	S	S	S	S	S	S	S	S	S	S	S	S
21	Stool	Citrobacter koseri	R	S	S	R	S	S	S	S	S	S	S	S	S	S
		Escherichia coli	S	S	S	S	S	S	S	S	S	S	S	S	S	S
23	Meconium	Escherichia coli	R	I	S	R	S	S	S	S	S	S	S	S	S	S	blaTEM-1
	Stool	Escherichia coli	R	I	S	R	S	S	S	S	S	S	S	S	S	S	blaTEM-1
		Escherichia coli	R	I	S	R	S	S	S	S	S	S	S	S	S	S	blaTEM-1
25	Stool	Pantoea spp	R	R	S	R	S	S	S	S	S	S	S	S	S	S
26	Stool	Escherichia coli	S	S	S	S	S	S	S	S	S	S	S	S	S	S
27	Stool	Escherichia coli	S	S	S	S	S	S	S	S	S	S	S	S	S	S
28	Stool	Escherichia coli	R	I	S	R	S	S	S	S	S	S	S	S	S	S	blaTEM-1
29	Meconium	Escherichia coli	S	S	S	S	S	S	S	S	S	S	S	S	S	S
	Stool	Escherichia coli	S	S	S	S	S	S	S	S	S	S	S	S	S	S
30	Stool	Hafnia alvei	R	R	S	S	S	S	S	S	S	S	S	S	S	S
31	Stool	Escherichia coli	I	I	S	S	S	S	S	S	S	S	S	S	S	S
		Escherichia coli	R	R	S	S	S	S	S	S	S	S	S	S	S	S
34	Meconium	Escherichia coli	S	S	S	S	S	S	S	S	S	S	S	S	S	S
	Stool	Escherichia coli	S	S	S	S	S	S	S	S	S	S	S	S	S	S
35	Meconium	Escherichia coli	S	S	S	S	S	S	S	S	S	S	S	S	S	S
	Stool	Escherichia coli	S	S	S	S	S	S	S	S	S	S	S	S	S	S
37	Stool	Escherichia coli	S	S	S	S	S	S	S	S	S	S	R	R	S	S
38	Stool	Klebsiella oxytoca	R	S	S	R	S	S	S	S	S	S	S	S	S	S
40	Meconium	Escherichia coli	S	S	S	S	S	S	S	S	S	S	S	S	S	S
	Stool	Escherichia coli	S	S	S	S	S	S	S	S	S	S	S	S	S	S
		Klebsiella oxytoca	R	S	S	R	S	S	S	S	S	S	S	S	S	S
42	Stool	Pseudomonas aeruginosa			R	R	S		I	S	S	S			S	R		class 1 integron	aadA6-orfD
43	Meconium	Escherichia coli	S	S	S	S	S	S	S	S	S	S	S	S	S	S
	Stool	Escherichia coli	S	S	S	S	S	S	S	S	S	S	S	S	S	S
		Morganella morganii	R	R	S	S	S	S	S	S	S	S	S	S	S	S
47	Stool	Klebsiella pneumoniae	R	I	S	R	S	S	S	S	S	S	S	S	S	S
		Escherichia coli	I	I	S	S	S	S	S	S	S	S	S	S	S	S
50	Stool	Enterobacter cloacae	R	R	S	S	S	S	S	S	S	S	S	S	S	S
		Escherichia coli	S	S	S	S	S	S	S	S	S	S	S	S	S	S		class 1 integron	aadA1
54	Stool	Escherichia coli	S	S	S	S	S	S	S	S	S	S	S	S	S	S
55	Stool	Escherichia coli	S	S	S	S	S	S	S	S	S	S	S	S	S	S
56	Stool	Escherichia coli	R	I	S	R	S	S	S	S	S	S	S	S	S	S	blaTEM-1
60	Stool	Escherichia coli	I	I	S	S	S	S	S	S	S	S	S	S	S	S
61	Stool	Pantoea spp	R	R	S	S	S	S	S	S	S	S	S	S	S	S
64	Stool	Escherichia coli	S	S	S	S	S	S	S	S	S	S	R	S	S	S
65	Stool	Escherichia coli	R	I	S	R	S	S	S	S	S	S	S	S	S	S	blaTEM-1
66	Meconium	Escherichia coli	S	S	S	S	S	S	S	S	S	S	S	S	S	S
		Escherichia coli	R	I	S	R	S	S	S	S	S	S	S	S	S	S	blaTEM-1
	Stool	Escherichia coli	R	I	S	R	S	S	S	S	S	S	S	S	S	S	blaTEM-1
		Escherichia coli	R	I	S	R	S	S	S	S	S	S	S	S	S	S	blaTEM-1
67	Stool	Stenotrophomonas maltophilia	R	R	S	R	R	R	S	I	I	I	S	S	S	S
68	Meconium	Escherichia coli	S	S	S	S	S	S	S	S	S	S	S	S	S	S
	Stool	Escherichia coli	S	S	S	S	S	S	S	S	S	S	S	S	S	S
71	Stool	Pantoea spp	R	R	S	I	S	S	S	S	S	S	S	S	S	S
		Pantoea spp	R	R	S	S	S	S	S	S	I	I	S	S	S	S
74	Stool	Escherichia coli	R	R	S	S	S	S	S	S	S	S	S	S	S	S
		Escherichia coli	R	R	R	R	S	R	R	S	S	S	S	S	S	S	hyperproduction of cephalosporinase
75	Meconium	Escherichia coli	S	S	S	S	S	S	S	S	S	S	S	S	S	S
	Stool	Escherichia coli	S	S	S	S	S	S	S	S	S	S	S	S	S	S
76	Stool	Enterobacter cloacae	R	R	S	S	S	S	S	S	S	S	S	S	S	S
77	Stool	Enterobacter aerogenes	R	R	R	R	S	R	R	S	S	S	S	S	S	S	hyperproduction of cephalosporinase
79	Stool	Escherichia coli	S	S	S	S	S	S	S	S	S	S	S	S	S	S
		Escherichia coli	S	S	S	S	S	S	S	S	S	S	S	S	S	S
81	Meconium	Escherichia coli	R	I	S	R	S	S	S	S	S	S	S	S	S	R	blaTEM-1	class 1 integron	not determined
	Stool	Escherichia coli	R	S	S	R	S	S	S	S	S	S	S	S	S	R	blaTEM-1	class 1 integron	not determined
82	Stool	Escherichia coli	R	I	S	R	S	S	S	S	S	S	S	S	S	S	blaTEM-1
83	Stool	Escherichia coli	R	I	S	R	S	S	S	S	R	R	R	R	S	R	blaTEM-1
85	Stool	Escherichia coli	S	S	S	S	S	S	S	S	S	S	S	S	S	S
86	Stool	Escherichia coli	S	S	S	S	S	S	S	S	S	S	S	S	S	S
89	Meconium	Escherichia coli	S	S	S	S	S	S	S	S	S	S	S	S	S	S
	Stool	Escherichia coli	S	S	S	S	S	S	S	S	S	S	S	S	S	S
90	Meconium	Escherichia coli	S	S	S	S	S	S	S	S	S	S	S	S	S	S
	Stool	Escherichia coli	S	S	S	S	S	S	S	S	S	S	S	S	S	S
93	Stool	Escherichia coli	S	S	S	S	S	S	S	S	S	S	S	S	S	S
95	Meconium	Escherichia coli	S	S	S	S	S	S	S	S	S	S	S	S	S	S
	Stool	Citrobacter freundii	R	R	S	S	S	S	S	S	S	S	S	S	S	S
96	Meconium	Escherichia coli	S	S	S	S	S	S	S	S	S	S	S	S	S	S
	Stool	Escherichia coli	S	S	S	S	S	S	S	S	S	S	S	S	S	S
97	Meconium	Escherichia coli	R	R	S	R	S	S	S	S	S	S	S	S	S	S		class 1 integron	not determined
	Stool	Escherichia coli	S	S	S	S	S	S	S	S	S	S	R	R	I	R	not determined	class 1 integron	dfrA17-aadA5
100	Stool	Escherichia coli	S	S	S	S	S	S	S	S	S	S	S	S	S	S
102	Stool	Escherichia coli	R	R	R	R	S	R	R	S	S	S	S	S	S	S	hyperproduction of cephalosporinase	class 1 integron	blaOXA-1-aadA1
104	Stool	Escherichia coli	S	S	S	S	S	S	S	S	S	S	S	S	S	S
106	Stool	Escherichia coli	R	I	S	R	S	S	S	S	S	S	S	S	S	S	blaTEM-1
107	Stool	Proteus mirabilis	S	S	S	S	S	S	S	S	S	S	S	S	S	S
108	Meconium	Escherichia coli	R	R	R	R	S	R	I	S	S	S	R	R	R	S	blaCTX-M-15
	Stool	Escherichia coli	R	R	R	R	S	R	I	S	S	S	R	R	R	S	blaCTX-M-15
109	Stool	Citrobacter koseri	R	S	S	R	S	S	S	S	S	S	S	S	S	S
		Klebsiella pneumoniae	R	S	S	R	S	S	S	S	S	S	S	S	S	S
111	Stool	Escherichia coli	S	S	S	S	S	S	S	S	S	S	S	S	S	S
113	Stool	Escherichia coli	S	S	S	S	S	S	S	S	S	S	S	S	S	S
115	Stool	Escherichia coli	S	S	S	S	S	S	S	S	S	S	S	S	S	S
118	Stool	Enterobacter aerogenes	R	R	S	R	S	S	S	S	S	S	S	S	S	R	blaTEM-1	class 1 integron	not determined
120	Stool	Escherichia coli	S	S	S	S	S	S	S	S	S	S	S	S	S	S
		Escherichia coli	S	S	S	S	S	S	S	S	S	S	S	S	S	S
121	Stool	Klebsiella oxytoca	R	S	S	R	S	S	S	S	S	S	S	S	S	S
124	Meconium	Escherichia coli	R	S	S	R	S	S	S	S	S	S	S	S	S	S	blaTEM-1
	Stool	Escherichia coli	S	S	S	S	S	S	S	S	S	S	S	S	S	S
		Escherichia coli	R	I	S	R	S	S	S	S	S	S	S	S	S	S	blaTEM-1
125	Stool	Escherichia coli	S	S	S	S	S	S	S	S	S	S	S	S	S	S
126	Stool	Escherichia coli	S	S	S	S	S	S	S	S	S	S	S	S	S	S
127	Stool	Escherichia coli	R	S	S	R	S	S	S	S	S	S	S	S	S	S	blaTEM-1
		Enterobacter cloacae	R	R	S	S	S	S	S	S	S	S	S	S	S	S
131	Meconium	Escherichia coli	S	S	S	S	S	S	S	S	S	S	S	S	S	S
	Stool	Escherichia coli	S	S	S	S	S	S	S	S	S	S	S	S	S	S
132	Stool	Escherichia coli	S	S	S	S	S	S	S	S	S	S	S	S	S	S
	Stool	Escherichia coli	S	S	S	S	S	S	S	S	S	S	S	S	S	S
133	Stool	Escherichia coli	I	I	S	S	S	S	S	S	S	S	S	S	S	S
134	Stool	Escherichia coli	S	S	S	S	S	S	S	S	S	S	S	S	S	S
135	Stool	Escherichia coli	S	S	S	S	S	S	S	S	S	S	S	S	S	S
136	Stool	Escherichia coli	I	I	S	S	S	S	S	S	S	S	S	S	S	S
138	Meconium	Escherichia coli	R	I	S	R	S	S	S	S	S	S	S	S	S	S	blaTEM-1
	Stool	Escherichia coli	R	I	S	R	S	S	S	S	S	S	S	S	S	S	blaTEM-1
139	Meconium	Pantoea spp	R	R	S	R	S	S	S	S	S	S	S	S	S	S
	Stool	Escherichia coli	S	S	S	S	S	S	S	S	S	S	S	S	S	S
142	Meconium	Escherichia coli	R	S	S	R	S	S	S	S	S	S	S	S	S	S	blaTEM-1
	Stool	Citrobacter freundii	R	R	S	S	S	S	S	S	S	S	S	S	S	S
		Klebsiella oxytoca	R	S	S	R	S	S	S	S	S	S	S	S	S	S
143	Stool	Escherichia coli	S	S	S	S	S	S	S	S	S	S	S	S	S	S
		Escherichia coli	S	S	S	S	S	S	S	S	S	S	S	S	S	S
145	Stool	Klebsiella oxytoca	R	S	S	R	S	S	S	S	S	S	S	S	S	S	blaTEM-1
		Klebsiella oxytoca	R	S	S	R	S	S	S	S	S	S	S	S	S	S	blaTEM-1
147	Stool	Escherichia coli	I	I	S	S	S	S	S	S	S	S	R	R	S	S
148	Meconium	Klebsiella pneumoniae	R	S	S	R	S	S	S	S	S	S	S	S	S	S
	Stool	Klebsiella pneumoniae	R	S	S	R	S	S	S	S	S	S	S	S	S	S
149	Stool	Escherichia coli	S	S	S	S	S	S	S	S	S	S	S	S	S	S
150	Stool	Escherichia coli	R	R	S	R	S	S	S	S	S	S	R	R	R	R	blaTEM-1	class 1 integron	dfrA17-aadA5
154	Stool	Citrobacter braakii	R	R	S	S	S	S	S	S	S	S	R	S	S	S
155	Meconium	Escherichia coli	R	R	S	R	S	S	S	S	S	S	S	S	S	R	blaTEM-1	class 1 integron	dfrA1-aadA1
	Stool	Escherichia coli	R	R	S	R	S	S	S	S	S	S	S	S	S	R	blaTEM-1	class 1 integron	dfrA1-aadA1
156	Stool	Klebsiella pneumoniae	R	S	S	R	S	S	S	S	S	S	S	S	S	S
157	Meconium	Escherichia coli	R	I	S	R	S	S	S	S	S	S	S	S	S	S	blaTEM-1
	Stool	Escherichia coli	R	S	S	R	S	S	S	S	S	S	S	S	S	S	blaTEM-1
158	Meconium	Escherichia coli	S	S	S	S	S	S	S	S	S	S	S	S	S	S
	Stool	Escherichia coli	S	S	S	S	S	S	S	S	S	S	S	S	S	S
159	Meconium	Escherichia coli	S	S	S	S	S	S	S	S	S	S	S	S	S	S
	Stool	Escherichia coli	S	S	S	S	S	S	S	S	S	S	S	S	S	S
160	Meconium	Klebsiella pneumoniae	R	S	S	R	S	S	S	S	S	S	S	S	S	S
	Stool	Klebsiella pneumoniae	R	S	S	R	S	S	S	S	S	S	S	S	S	R		class 2 integron	dfrA1-sat2-aadA1
161	Meconium	Escherichia coli	R	I	S	R	S	S	S	S	S	S	S	S	S	S	blaTEM-1
	Stool	Escherichia coli	R	I	S	R	S	S	S	S	S	S	S	S	S	S	blaTEM-1
163	Stool	Pantoea spp	R	R	S	R	S	S	S	S	S	S	S	S	S	S
164	Stool	Escherichia coli	I	I	S	S	S	S	S	S	S	S	S	S	S	S
165	Meconium	Klebsiella pneumoniae	R	S	S	R	S	S	S	S	S	S	R	S	S	S
	Stool	Klebsiella pneumoniae	R	S	S	R	S	S	S	S	S	S	S	S	S	S
169	Stool	Escherichia coli	S	S	S	S	S	S	S	S	S	S	S	S	S	S
171	Stool	Klebsiella pneumoniae	R	S	S	R	S	S	S	S	S	S	S	S	S	S
172	Stool	Escherichia coli	S	S	S	S	S	S	S	S	S	S	S	S	S	S
		Escherichia coli	R	I	S	R	S	S	S	S	S	S	S	S	S	R	blaTEM-1	class 1 integron	not determined
173	Stool	Escherichia coli	S	S	S	S	S	S	S	S	S	S	S	S	S	S
		Escherichia coli	S	S	S	S	S	S	S	S	S	S	S	S	S	S
174	Meconium	Escherichia coli	S	S	S	S	S	S	S	S	S	S	S	S	S	S
	Stool	Escherichia coli	R	S	S	R	S	S	S	S	S	S	S	S	S	R	blaTEM-1
		Escherichia coli	S	S	S	S	S	S	S	S	S	S	S	S	S	S
177	Stool	Escherichia coli	S	S	S	S	S	S	S	S	S	S	S	S	S	S
179	Stool	Escherichia coli	S	S	S	S	S	S	S	S	S	S	S	S	S	S
		Proteus mirabilis	R	R	I	R	R	S	S	S	S	S	S	S	S	R	blaTEM-1	class 2 integron	dfrA1-sat2-aadA1
180	Stool	Escherichia coli	S	S	S	S	S	S	S	S	S	S	S	S	S	S
181	Stool	Escherichia coli	R	R	S	R	S	S	S	S	S	S	R	I	S	S	blaTEM-1
		Escherichia coli	S	S	S	S	S	S	S	S	S	S	S	S	S	S
183	Stool	Escherichia coli	R	R	S	R	S	S	S	S	S	S	S	S	S	S	blaTEM-1
184	Stool	Escherichia coli	R	R	S	R	S	S	S	S	S	S	R	R	S	R	blaTEM-1
185	Meconium	Escherichia coli	S	S	S	S	S	S	S	S	S	S	S	S	S	S
	Stool	Escherichia coli	S	S	S	S	S	S	S	S	S	S	S	S	S	S
187	Meconium	Escherichia coli	R	S	S	R	S	S	S	S	S	S	S	S	S	S	blaTEM-1
	Stool	Escherichia coli	R	S	S	R	S	S	S	S	S	S	S	S	S	S	blaTEM-1
188	Stool	Escherichia coli	S	S	S	S	S	S	S	S	S	S	S	S	S	S
189	Stool	Pseudomonas aeruginosa			S	S	I		S	S	S	S			S	R
189		Proteus mirabilis	S	S	S	S	S	S	S	S	S	S	S	S	S	S
190	Stool	Escherichia coli	S	S	S	S	S	S	S	S	S	S	S	S	S	S
193	Stool	Enterobacter cloacae	R	R	S	S	S	S	S	S	S	S	S	S	S	S
194	Stool	Enterobacter cloacae	R	R	S	S	S	S	S	S	S	S	S	S	S	S
198	Stool	Escherichia coli	S	S	S	S	S	S	S	S	S	S	S	S	S	S
199	Stool	Escherichia coli	S	S	S	S	S	S	S	S	S	S	S	S	S	S
200	Stool	Escherichia coli	I	I	S	S	S	S	S	S	R	R	R	S	S	S
202	Stool	Escherichia coli	S	S	S	S	S	S	S	S	S	S	S	S	S	S
203	Stool	Escherichia coli	R	S	S	R	S	S	S	S	R	R	S	S	S	R	blaTEM-1	class 1 integron	dfrA17-aadA5
204	Stool	Escherichia coli	S	S	S	S	S	S	S	S	S	S	S	S	S	S
205	Stool	Escherichia coli	S	S	S	S	S	S	S	S	S	S	S	S	S	S
206	Stool	Escherichia coli	S	S	S	S	S	S	S	S	S	S	S	S	S	S
		Escherichia coli	S	S	S	S	S	S	S	S	S	S	S	S	S	S
207	Stool	Citrobacter koseri	R	S	S	R	S	S	S	S	S	S	S	S	S	S
208	Stool	Escherichia coli	R	R	S	R	S	S	S	S	S	S	R	I	S	R	blaTEM-1	class 1 integron	not determined
		Escherichia coli	R	R	S	R	S	S	S	S	S	S	R	R	S	R	blaTEM-1	class 1 integron	not determined
210	Stool	Escherichia coli	R	I	S	R	S	S	S	S	S	S	S	S	S	S	blaTEM-1
212	Meconium	Escherichia coli	S	S	S	S	S	S	S	S	S	S	S	S	S	S
	Stool	Escherichia coli	S	S	S	S	S	S	S	S	S	S	S	S	S	S
213	Meconium	Escherichia coli	R	S	S	R	S	S	S	S	S	S	S	S	S	S	blaTEM-1
	Stool	Escherichia coli	S	S	S	S	S	S	S	S	S	S	S	S	S	S
214	Meconium	Escherichia coli	S	S	S	S	S	S	S	S	S	S	S	S	S	S
	Stool	Escherichia coli	S	S	S	S	S	S	S	S	S	S	S	S	S	S
		Klebsiella pneumoniae	R	S	S	R	S	S	S	S	S	S	S	S	S	S
215	Meconium	Escherichia coli	R	S	S	R	S	S	S	S	S	S	S	S	S	S	blaTEM-1
	Stool	Escherichia coli	R	S	S	R	S	S	S	S	S	S	S	S	S	S	blaTEM-1
217	Stool	Escherichia coli	R	I	S	R	S	S	S	S	S	S	S	S	S	S	blaTEM-1
219	Stool	Escherichia coli	R	I	S	R	S	S	S	S	S	S	R	S	S	S	blaTEM-1
		Escherichia coli	R	I	S	R	S	S	S	S	S	S	R	S	S	S	blaTEM-1
220	Stool	Escherichia coli	R	I	S	R	S	S	S	S	S	S	S	S	S	S	blaTEM-1
		Escherichia coli	R	S	S	R	S	S	S	S	S	S	S	S	S	S	blaTEM-1
223	Meconium	Escherichia coli	I	I	S	S	S	S	S	S	S	S	R	R	S	S
		Escherichia coli	S	S	S	S	S	S	S	S	S	S	S	S	S	S
	Stool	Escherichia coli	S	S	S	S	S	S	S	S	S	S	R	S	S	S
		Escherichia coli	I	I	S	S	S	S	S	S	S	S	R	S	S	S
227	Stool	Klebsiella oxytoca	R	S	S	R	S	S	S	S	S	S	S	S	S	S
228	Stool	Klebsiella oxytoca	R	S	S	R	S	S	S	S	S	S	S	S	S	S
229	Stool	Escherichia coli	S	S	S	S	S	S	S	S	S	S	S	S	S	S
231	Stool	Enterobacter cloacae	R	R	S	S	S	S	S	S	S	S	S	S	S	S
234	Stool	Escherichia coli	R	R	S	R	S	S	S	S	S	S	S	S	S	S	blaTEM-1
		Escherichia coli	R	R	S	R	S	S	S	S	S	S	S	S	S	S	blaTEM-1
235	Meconium	Escherichia coli	I	I	S	S	S	S	S	S	S	S	S	S	S	S
	Stool	Escherichia coli	S	S	S	S	S	S	S	S	S	S	S	S	S	S
237	Meconium	Escherichia coli	S	S	S	S	S	S	S	S	S	S	S	S	S	S
	Stool	Escherichia coli	S	S	S	S	S	S	S	S	S	S	S	S	S	S
238	Stool	Escherichia coli	S	S	S	S	S	S	S	S	S	S	S	S	S	S
239	Meconium	Escherichia coli	S	S	S	S	S	S	S	S	S	S	S	S	S	S
	Stool	Escherichia coli	S	S	S	S	S	S	S	S	S	S	S	S	S	S
241	Meconium	Escherichia coli	S	S	S	S	S	S	S	S	S	S	S	S	S	S
241	Stool	Escherichia coli	S	S	S	S	S	S	S	S	S	S	S	S	S	S
243	Stool	Escherichia coli	S	S	S	S	S	S	S	S	S	S	S	S	S	S
247	Stool	Escherichia coli	R	S	S	R	S	S	S	S	S	S	R	R	I	R	blaTEM-1	class 1 integron	dfrA1-aadA1
250	Stool	Klebsiella oxytoca	R	S	S	R	S	S	S	S	S	S	S	S	S	S
